# Supplementary material for: Eco-compatible oxides enabling energy storage via Li+/Mg2+ co-intercalation
Source: Royal Society of Chemistry journal article supplement (doi:10.1039/c9dt02966d), 2019-01-01

## Supplementary Information

### **Eco-compatible Oxides Enabling Energy Storage via Li<sup>+</sup>/Mg<sup>2+</sup> Co- intercalation**

Sv. Veleva <sup>1</sup>, Sv. Ivanova <sup>2</sup>, P. Polrolniczak <sup>3</sup>, K. Wasinski <sup>3</sup>, D. Nihtianova <sup>2</sup>, A. E. Stoyanova <sup>1</sup>  
and R. Stoyanova <sup>2\*</sup>

<sup>1</sup> Institute of Electrochemistry and Energy Systems, Bulgarian Academy of Sciences, Sofia 1113,  
Bulgaria

<sup>2</sup> Institute of General and Inorganic Chemistry, Bulgarian Academy of Sciences, Sofia 1113,  
Bulgaria

<sup>3</sup> Institute of Non-Ferrous Metals, Division in Poznań, Central Laboratory of Batteries and Cells,  
61-362 Poznań, Poland

**Figure S1** BF-STEM images and corresponding composition map of Mn K $\alpha$ 1, Mg K $\alpha$ 1 and O K $\alpha$ 1 for MgMn<sub>2</sub>O<sub>4</sub> spinels annealed at 350 °C (a) and 550 °C (b).

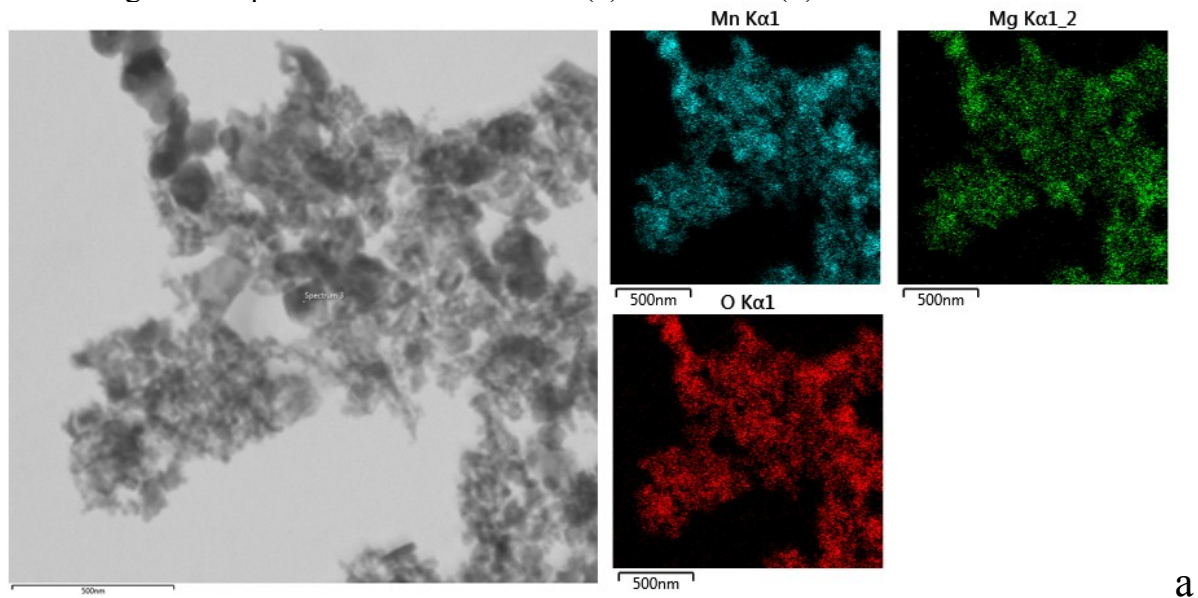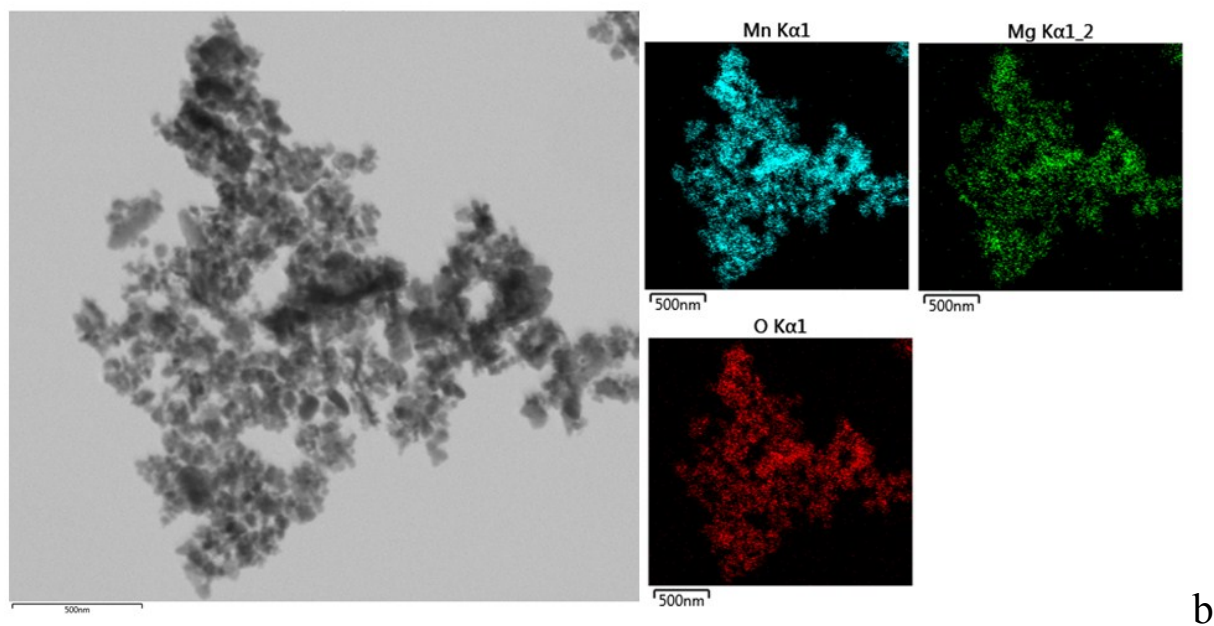

**Figure S2** BF-STEM images and corresponding composition map of Mn K $\alpha$ 1, Mg K $\alpha$ 1 and O K $\alpha$ 1 for MgMn<sub>2</sub>O<sub>4</sub> electrodes: (a) inverse MgMn<sub>2</sub>O<sub>4</sub> cycled in lithium electrolyte; (b) normal MgMn<sub>2</sub>O<sub>4</sub> cycled in lithium electrolyte, and (c) inverse MgMn<sub>2</sub>O<sub>4</sub> cycled in lithium electrolyte.

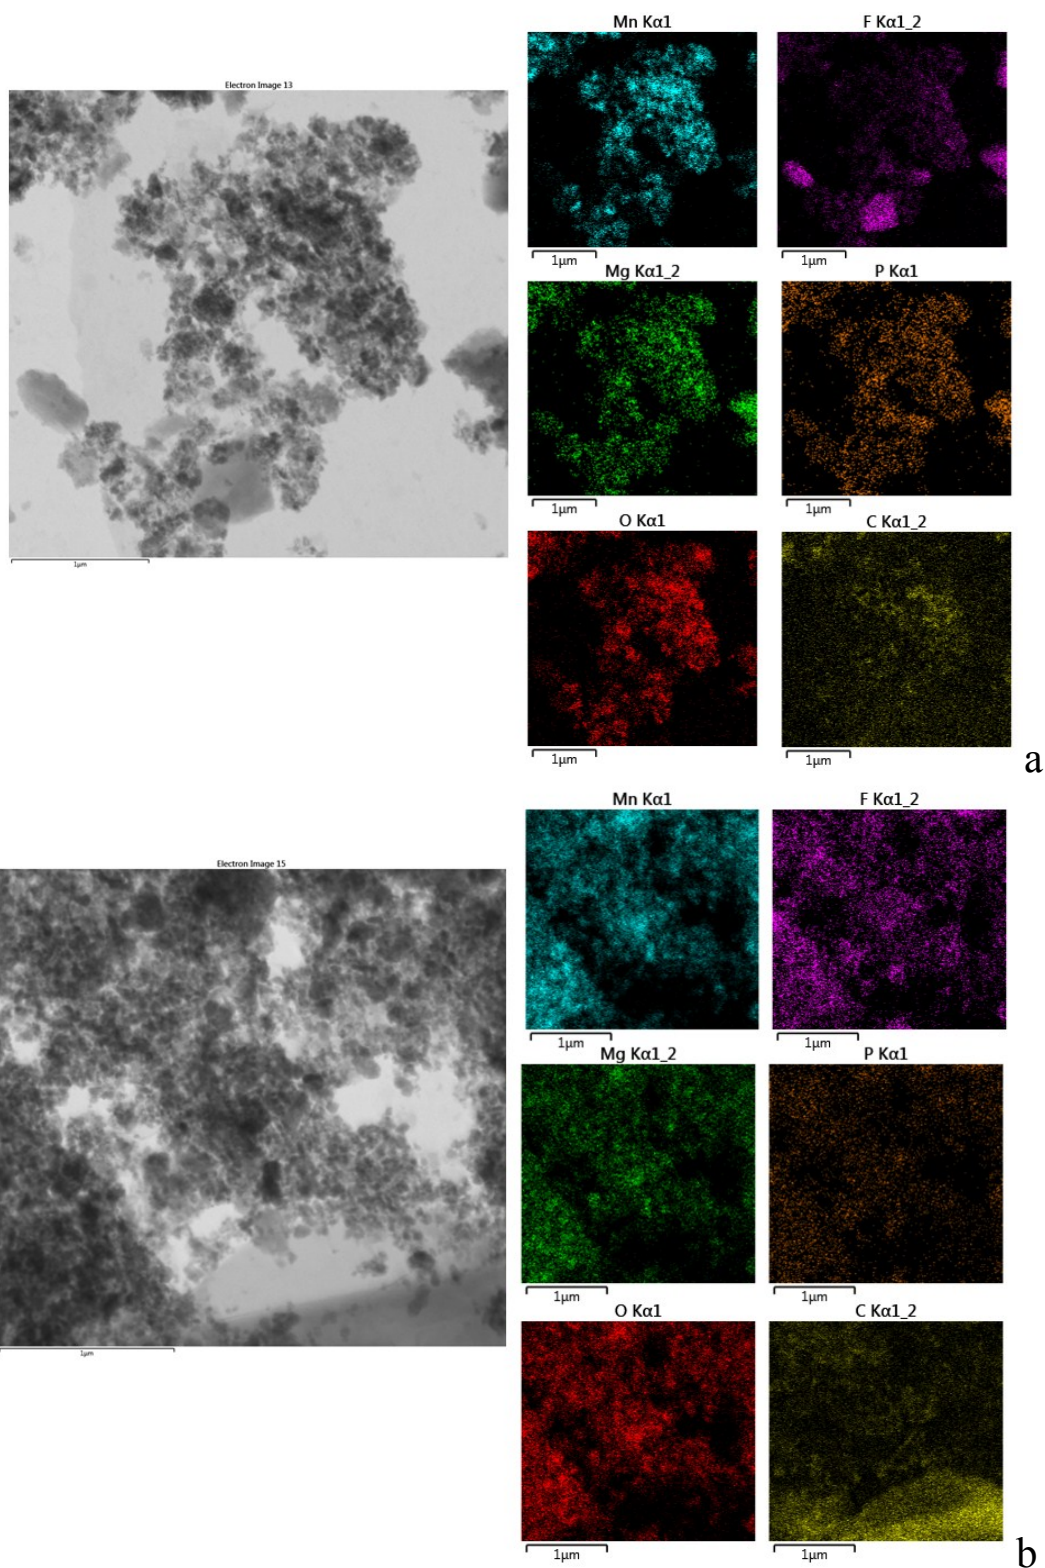

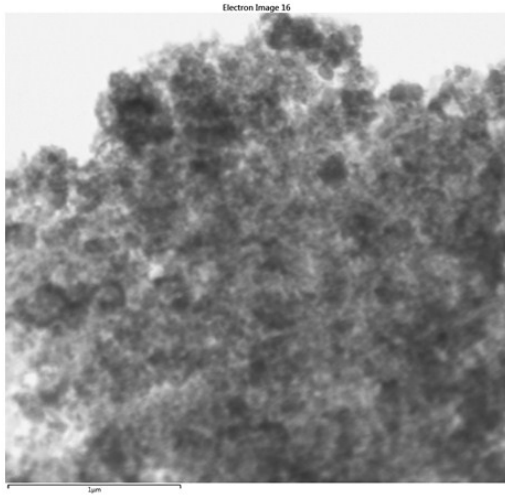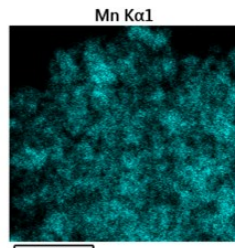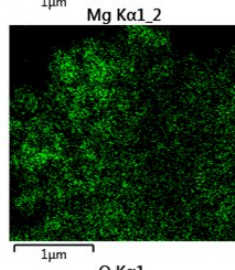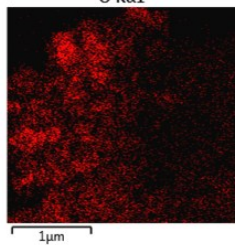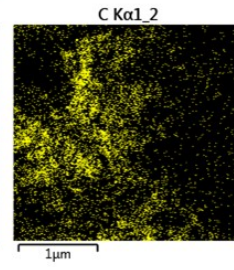

C

**Figure S3** SEM image of monoclinic  $\text{Li}_2\text{TiO}_3$ .

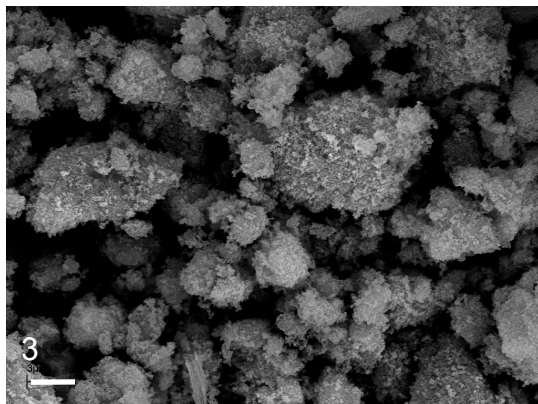

Supplement: c9dt02966d1.pdf [file c9dt02966d1.pdf]
